# Supplementary material for: Gpr116 Receptor Regulates Distinctive Functions in Pneumocytes and Vascular Endothelium
Source: PubMed Central journal article supplement (PMC4579087; doi:10.1371/journal.pone.0137949), 2015-09-22

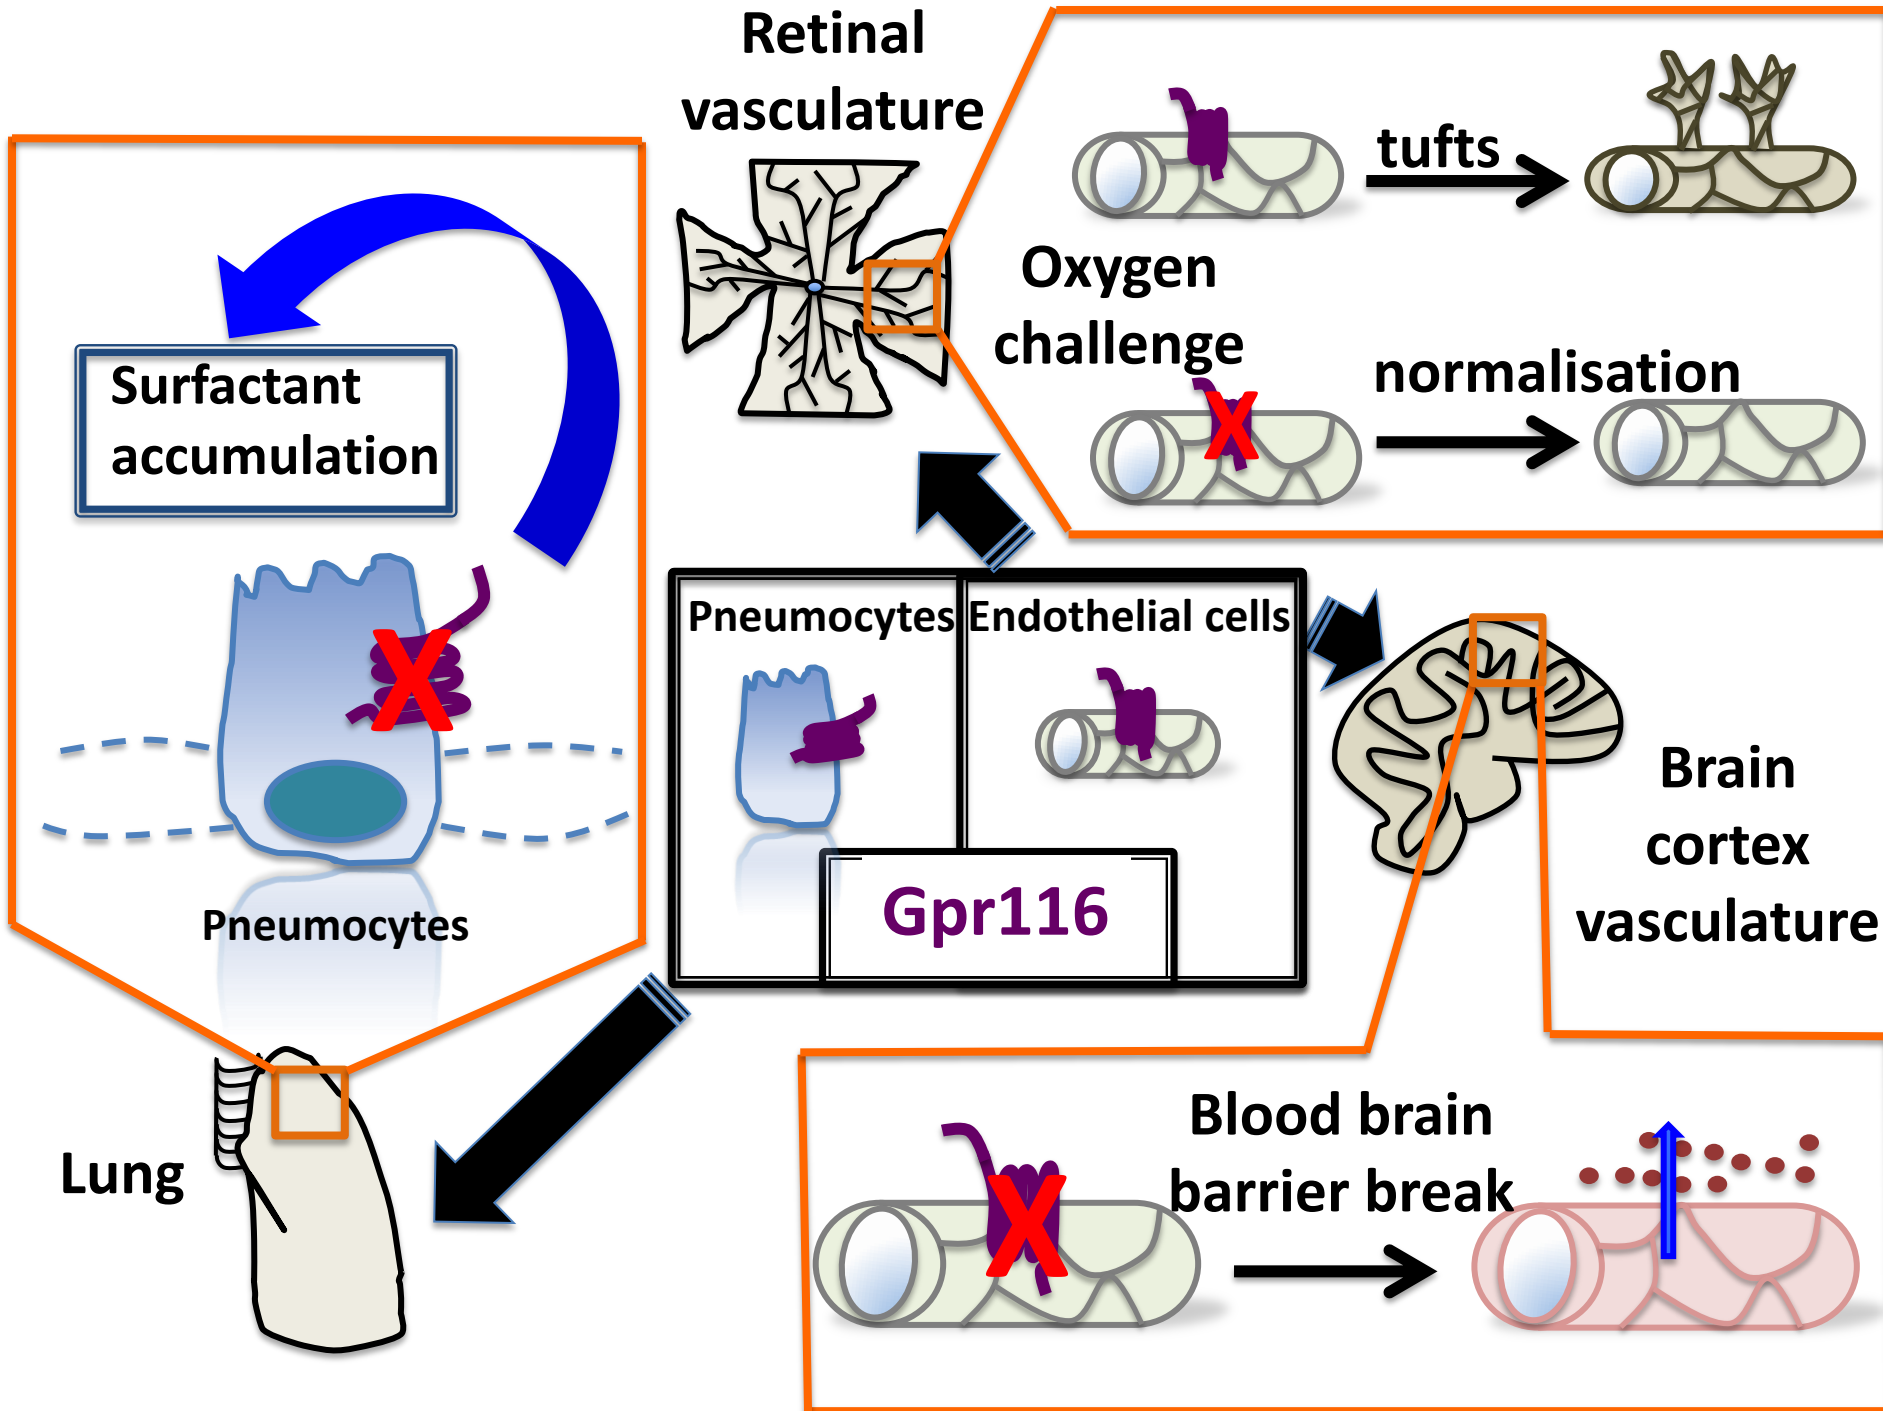

Supplement: pone.0137949.s005.pdf [file pone.0137949.s005.pdf]
